# Supplementary material
Source: PubMed Central journal article supplement (PMC8863504)
Supplement: mmc1.pdf [file mmc1.pdf]

# THE LANCET

## Healthy Longevity

### Supplementary appendix 1

This translation in French was submitted by the authors and we reproduce it as supplied. It has not been peer reviewed. *The Lancet's* editorial processes have only been applied to the original in English, which should serve as reference for this manuscript.

Cette traduction en français a été proposée par les auteurs et nous l'avons reproduite telle quelle. Elle n'a pas été examinée par des pairs. Les processus éditoriaux du *Lancet* n'ont été appliqués qu'à l'original en anglais et c'est cette version qui doit servir de référence pour ce manuscrit.

Supplement to: Vinh DC, Gouin J-P, Cruz-Santiago D, et al. Real-world serological responses to extended-interval and heterologous COVID-19 mRNA vaccination in frail, older people (UNCOVER): an interim report from a prospective observational cohort study. *Lancet Healthy Longev* 2022; published online Feb 21. [https://doi.org/10.1016/S2666-7568\(22\)00012-5](https://doi.org/10.1016/S2666-7568(22)00012-5).

## Contexte

L'utilisation des vaccins contre la COVID-19 a été priorisée afin de protéger d'abord les personnes les plus vulnérables, notamment, les personnes âgées. En raison des fluctuations dans la disponibilité des vaccins, des stratégies comme le report de la seconde dose et l'utilisation de secondes doses hétérologues ont été adoptées. Toutefois, l'efficacité de ces stratégies auprès des personnes âgées fragiles est inconnue. Cette étude avait pour but d'évaluer l'antigénicité des vaccins à ARNm administrés avec un intervalle de 16 semaines entre la première et la seconde dose chez les personnes âgées fragiles dans un contexte écologique.

## Méthodes

Cette étude longitudinale a été menée dans 12 centres d'hébergement de soins de longue durée du Centre intégré universitaire de santé et de services sociaux du Centre-Sud-de-l'Île-de-Montréal, Québec, Canada. Dans le contexte d'une stratégie de rationnement décrétée par le gouvernement, les adultes de plus de 65 ans résidant dans des centres de soins de longue durée, ayant ou non un historique d'infection au SRAS-CoV-2, ont reçu des doses homologues ou hétérologues de vaccins à ARNm avec dans un intervalle prolongé de 16 semaines entre les deux doses. Tous les résidents âgés des centres de soins participants étaient éligibles à cette étude. Les participants ont été recrutés du 31 décembre 2020 au 16 février 2021 et les données ont été collectées jusqu'au 9 juin 2021. Des données cliniques et des prélèvements sanguins ont été recueillis au temps de mesure suivants : au temps de base avant la 1<sup>ère</sup> dose du vaccin, à 4 semaines après la 1<sup>ère</sup> dose, de 6-10 semaines après la 1<sup>ère</sup> dose, à environ 16 semaines après la 1<sup>ère</sup> dose, soit jusqu'à 2 jours avant la 2<sup>ème</sup> dose, et à 4 semaines après la seconde dose. Le sérum a été analysé à l'aide d'un dosage automatisé ELISA par chimioluminescence pour détecter les immunoglobulines G (IgG) anti-SRAS-CoV-2 spécifiques, soit les anticorps dirigés contre le trimère du spicule (anti-S), le domaine de liaison du récepteur (anti-RBD) et la nucléocapside. Deux cohortes ont été utilisées dans cette étude : une cohorte initiale pour laquelle le prélèvement des échantillons sanguins a débuté avant l'administration de la première dose du vaccin et une cohorte de confirmation pour laquelle les échantillons sanguins ont été recueillis à partir de la 4<sup>ème</sup> semaine après la première dose du vaccin. Les analyses ont été effectuées dans la cohorte initiale, puis validées dans la cohorte de confirmation lorsqu'applicable.

## Résultats

Cette étude comprend 185 participants. 65 participants ont reçu deux doses du vaccin mRNA-1273 (Spikevax; Moderna), 36 ont reçu deux doses du vaccin BNT162b2 (Comirnaty; Pfizer–BioNTech), et 84 ont reçu le vaccin mRNA-1273 suivi du BNT162b2. Dans la cohorte initiale, après une augmentation significative des IgG anti-S et anti-RBD 4 semaines après la première dose du vaccin (de 4.86 log unités d'anticorps de liaison [binding antibody units; BAU]/mL à 8.53 log BAU/mL pour IgG anti-RBD et de 5.21 log BAU/mL à 8.05 log BAU/mL pour IgG anti-S), une réduction significative des niveaux des IgG anti-RBD et anti-S a été observée jusqu'à la seconde dose (7.10 log BAU/mL pour IgG anti-RBD et 7.60 log BAU/mL pour IgG anti-S), suivie d'une augmentation 4 semaines après la deuxième dose pour les deux vaccins (9.58 log BAU/mL pour IgG anti-RBD et 9.23 log BAU/mL pour IgG anti-S). Les participants sans

historique d'infection au SRAS-CoV-2 ont montré des niveaux d'anticorps inférieurs à ceux des participants ayant été infectés au SRAS-CoV-2 jusqu'à 16 semaines après la première dose, mais ont atteint des niveaux d'anticorps comparables à ceux des participants préalablement infectés 4 semaines après la seconde dose du vaccin. Les participants ayant reçu le vaccin BNT162b2 en première dose ont montré une diminution plus importante de la concentration des IgG anti-RBD et anti-S durant l'intervalle de 16 semaines entre les deux doses (de 8.12 log BAU/mL à 4.25 log BAU/mL pour IgG anti-RBD et de 8.18 log BAU/mL à 6.66 log BAU/mL pour IgG anti-S), en comparaison aux participants qui ont reçu le vaccin mRNA-1273 (deux doses de mRNA-1273: de 8.06 log BAU/mL à 7.49 log BAU/mL pour IgG anti-RBD et de 6.82 log BAU/mL à 7.56 log BAU/mL for IgG anti-S; mRNA-1273 suivi de BNT162b2: de 8.83 log BAU/mL à 7.95 log BAU/mL pour IgG anti-RBD et de 8.50 log BAU/mL à 7.97 log BAU/mL pour IgG anti-S). Aucune différence dans les niveaux d'anticorps n'a été notée entre les deux vaccins 4 semaines après la deuxième dose, qu'elle ait été administrée de façon homologue ou hétérologue.

### Interprétation

Les résultats intérimaires de cette étude longitudinale en cours montrent que, chez les personnes âgées fragiles, l'infection préalable au SRAS-CoV-2 et le type de vaccin à ARNm influencent la réponse des anticorps lorsqu'il y a un intervalle de 16 semaines entre les doses. Dans ces cohortes de personnes âgées fragiles dont l'âge et les comorbidités sont semblables, nous avons constaté que la réponse sérologique était similaire et équivalente sur le plan clinique entre la cohorte initiale et la cohorte de confirmation. L'administration homologue ou hétérologue des vaccins à ARNm n'était pas associée à des différences significatives dans la réponse des anticorps 4 semaines après la seconde dose, ce qui appuie l'interchangeabilité de ces vaccins.
